# Supplementary material for: Multimorbidity and overall comorbidity of sleep apnoea: a Finnish nationwide study
Source: PubMed Central journal article supplement — ERJ Open Res. 2022 Jun 6;8(2):00646-2021. doi: 10.1183/23120541.00646-2021 (PMC9168083; doi:10.1183/23120541.00646-2021), 2022-06-06
Supplement: 00646-2021.supplement.pdf [file 00646-2021.supplement.pdf]

## **Appendix.**

### **Major common chronic disease groups in Sleep Apnea**

As a basis for the disease grouping, we used the classification of chronic comorbidities used by the Finnish Institute for Health and Welfare, which relies on the proposal made by Calderón-Larrañaga et al. in *Gerontol A Biol Sci Med Sci*, 2017, Vol. 72, No. 10, 1417–1423.

To make the classification more relevant for sleep apnea, we chose 26 diseases or disease groups of interest for analysis, based on expert opinion. The rationale for inclusion of each disease or disease group in the analyses can be found in the table below.

To better capture the chronic disease diagnoses made in the primary healthcare sector, we included also ICPC-2 coding, which is a primary healthcare coding system proposed by the WHO. It is used by some, but not all primary healthcare providers in Finland. The ICPC-2 coding book includes a ICD-10 to ICPC-2 conversion code list, which was used to select the ICPC-2 codes for our analyses (<https://www.who.int/standards/classifications/other-classifications/international-classification-of-primary-care>).

| Disease group                       | ICD-10                                   | ICPC-2                                                                            | Rationale for including disease group in analyses                                             |
|-------------------------------------|------------------------------------------|-----------------------------------------------------------------------------------|-----------------------------------------------------------------------------------------------|
| Asthma                              | J45-J46                                  | R81                                                                               | Possible bidirectional association with SA                                                    |
| Atrial fibrillation                 | I48                                      | K78                                                                               | Associated with SA                                                                            |
| Cancer                              | C00-C97                                  | A79, B72-74, D75-77, L71, N74, R84-85, S77, S79, T71, U75-77, W72, X75-77, Y77-78 | Association with SA controversial                                                             |
| Cardiovascular disease              | I10-I99 excl. I10, I15, I48, I50, I60-69 | B71, K74- K76, K70, K79-80, K82-84, K88, K92-93, K94, K96                         | Associated with SA                                                                            |
| Cerebrovascular disease             | I60-I69                                  | K99                                                                               | Associated with SA                                                                            |
| COPD                                | J44                                      | R95                                                                               | Co-occurrence of COPD and SA associated with high risk                                        |
| Dementia & other cerebral disorders | F00-F19, G30-G32                         | P16, P18-19, P40                                                                  | Some evidence of association with SA, possible under-recognition of SA symptoms               |
| Diabetes                            | E10-E14                                  | T89-90                                                                            | Metabolic syndrome associated with SA                                                         |
| Dyslipidaemia                       | E78                                      | T93                                                                               | Associated with SA as part of metabolic syndrome                                              |
| Gastrointestinal disease            | K05-K87                                  | D07, D12, D84-87, D93-99                                                          | Some gastrointestinal diseases (e.g., gastro-oesophageal reflux) have been associated with SA |
| Glaucoma                            | H40, H42                                 | F93                                                                               | Some evidence of association with SA                                                          |
| Heart failure                       | I50                                      | K77                                                                               | Associated with SA                                                                            |
| Hypertension                        | I10, I15                                 | K86-87                                                                            | Associated with SA                                                                            |
| Kidney & urinary tract disease      | N00-N23                                  | U06, U14, U88, U95, U99                                                           | Uraemia associated with SA                                                                    |
| Other metabolic disease             | E15-E90 excl. E65-E66, E78               | T80-81, T87, T93, T99                                                             | Metabolic syndrome associated with SA                                                         |
| Mood & neurotic disorders           | F30-F69                                  | P02, P07, P09, P74-78, P86, P99                                                   | Mood and anxiety disorders associated with SA                                                 |
| Musculoskeletal disorders           | M05-M94                                  | L01-03, L83-99                                                                    | SA possibly modifies chronic pain                                                             |

|                                      |                                          |                     |                                                                                              |
|--------------------------------------|------------------------------------------|---------------------|----------------------------------------------------------------------------------------------|
| Neurological disorders               | G10-G13, G20-26, G35-37 excl. G47, G25.8 | N08, N86-94, N99    | Stroke associated with SA; neuromuscular diseases associated with sleep-disordered-breathing |
| Nonorganic sleep disorders           | F51                                      |                     | Insomnia and SA frequently co-occur.                                                         |
| Obesity                              | E65-66                                   | T82-83              | Strong association with SA                                                                   |
| Organic sleep disorders              | G47, G25.8                               |                     | Hypersomnia main feature in SA. Periodic limb movement disorder associated with SA           |
| Reflux                               | K21                                      | D84                 | Associated with SA                                                                           |
| Other respiratory disease            | J30-J99 excl. J44-45                     | R75-79, R90, R95-99 | Asthma and COPD associated with SA - limited evidence for other respiratory disease          |
| Schizophrenia & delusional disorders | F20-29                                   | P71-73, P98         | Under-recognition of SA in severe psychiatric disorders                                      |
| Thyroid disease                      | E00-07                                   | T85-86              | Hypothyroidism associated with SA                                                            |
| Urogenital disease                   | N40-51, N80, N81, N88                    | Y73, Y85-87, Y99    | Prostatic enlargement and nocturia may be associated with SA                                 |

SA, sleep apnoea. COPD, chronic obstructive pulmonary disease.
